# Supplementary material for: Potential energy profile for the Cl + (H2O)3 → HCl + (H2O)2OH reaction. A CCSD(T) study
Source: Royal Society of Chemistry journal article supplement (doi:10.1039/d1cp04309a), 2021-01-01
Supplement: d1cp04309a1.pdf [file d1cp04309a1.pdf]

*Supporting Information*

**Potential Energy Profile for the  $\text{Cl} + (\text{H}_2\text{O})_3 \rightarrow \text{HCl} + (\text{H}_2\text{O})_2\text{OH}$  Reaction. A CCSD(T) Study**

Guoliang Li,<sup>\*a</sup> Ying Yao,<sup>a</sup> Shengyao Lü,<sup>a</sup> Yaoming Xie,<sup>b</sup> Gary E. Douberly,<sup>b</sup> and Henry F. Schaefer III<sup>\*b</sup>

<sup>a</sup>Key Laboratory of Theoretical Chemistry of Environment, Ministry of Education; Center for Computational Quantum Chemistry, School of Chemistry, South China Normal University, Guangzhou, 510006, P. R. China

<sup>b</sup>Department of Chemistry and Center for Computational Quantum Chemistry, University of Georgia, Athens, Georgia, 30602, USA  
e-mails: [ccq@uga.edu](mailto:ccq@uga.edu) and [glli@scnu.edu.cn](mailto:glli@scnu.edu.cn)

**Figure S1.** Four pathways of the water *trimer* reaction  $\text{Cl} + (\text{H}_2\text{O})_3 \rightarrow \text{HCl} + (\text{H}_2\text{O})_2\text{OH}$  with the MPW1K/cc-pVTZ method.

Complete Gaussian 16 reference.

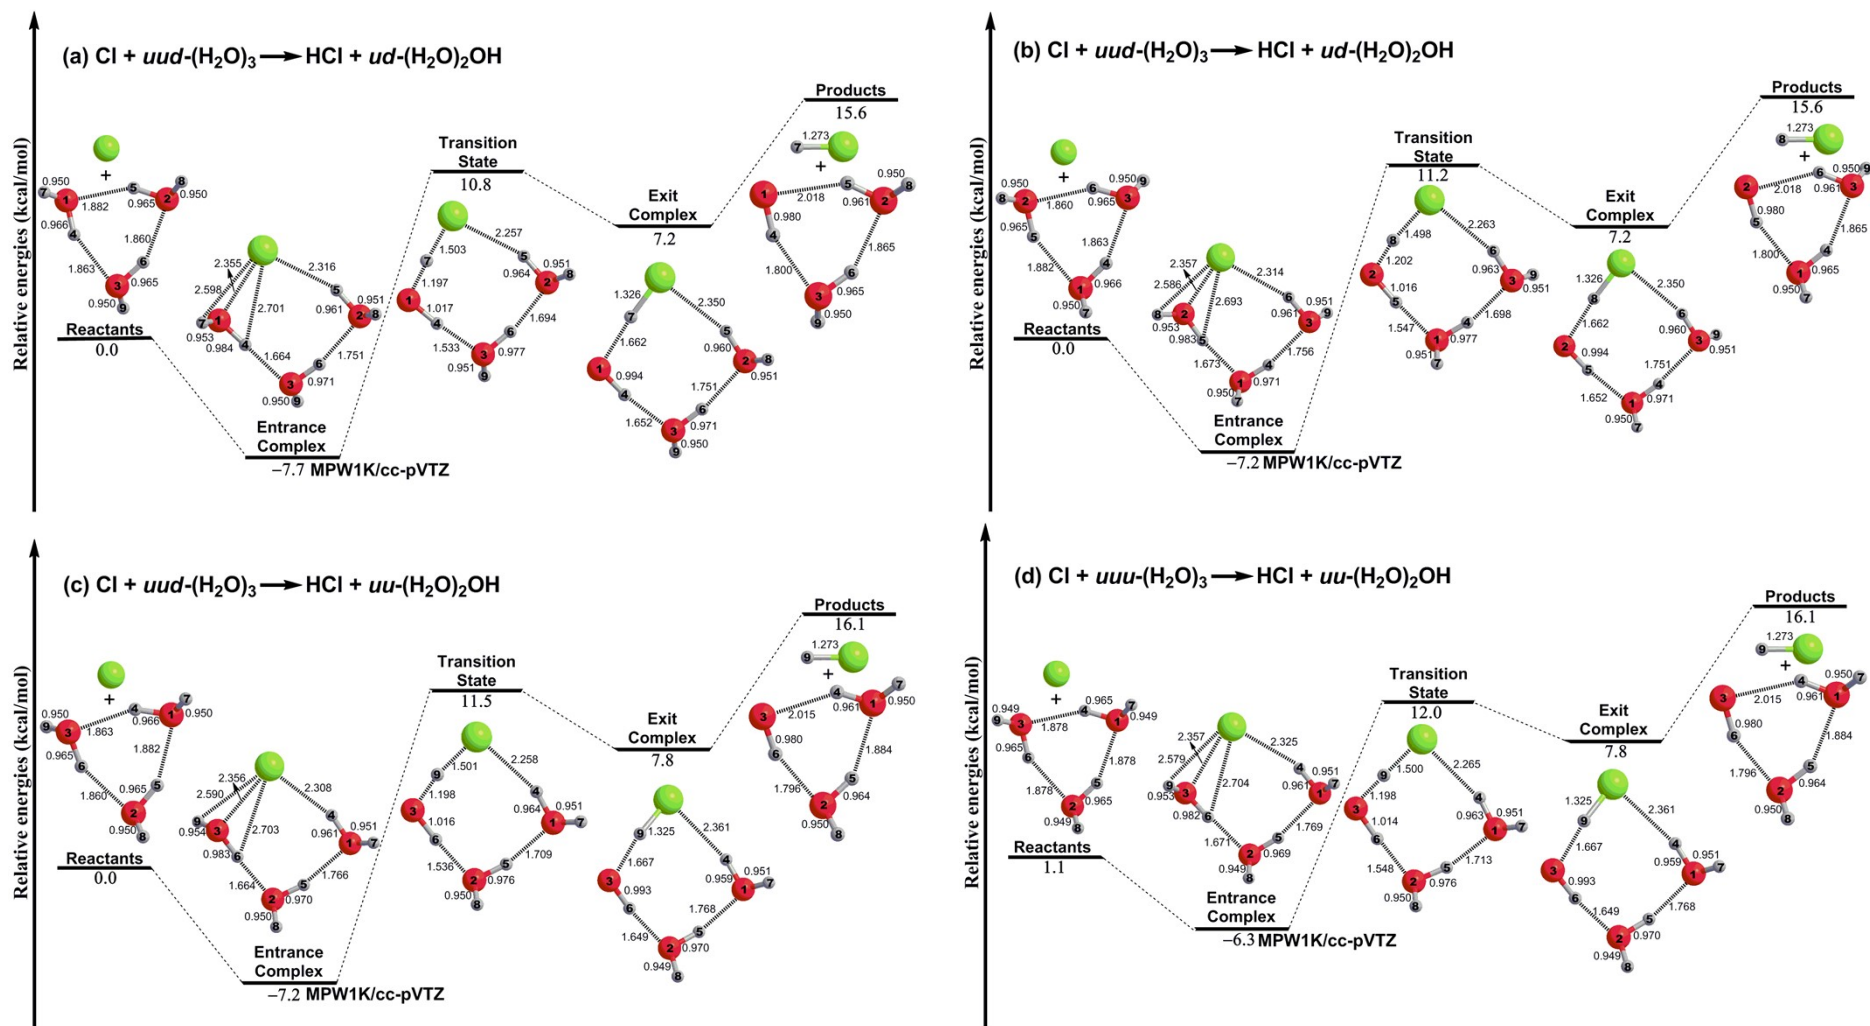

**Figure S1** Four pathways of the water *trimer* reaction  $\text{Cl} + (\text{H}_2\text{O})_3 \rightarrow \text{HCl} + (\text{H}_2\text{O})_2\text{OH}$  with the MPW1K/cc-pVTZ method. All bond distances were given in angstroms and all energies, relative to separated  $\text{Cl} + \text{uud}-(\text{H}_2\text{O})_3$ , were given in kcal/mol.

## Complete Gaussian 16 reference

M. J. Frisch, G. W. Trucks, H. B. Schlegel, G. E. Scuseria, M. A. Robb, J. R. Cheeseman, G. Scalmani, V. Barone, G. A. Petersson, H. Nakatsuji, X. Li, M. Caricato, A. V. Marenich, J. Bloino, B. G. Janesko, R. Gomperts, B. Mennucci, H. P. Hratchian, J. V. Ortiz, A. F. Izmaylov, J. L. Sonnenberg, D. Williams-Young, F. Ding, F. Lipparini, F. Egidi, J. Goings, B. Peng, A. Petrone, T. Henderson, D. Ranasinghe, V. G. Zakrzewski, J. Gao, N. Rega, G. Zheng, W. Liang, M. Hada, M. Ehara, K. Toyota, R. Fukuda, J. Hasegawa, M. Ishida, T. Nakajima, Y. Honda, O. Kitao, H. Nakai, T. Vreven, K. Throssell, J. A. Montgomery, Jr., J. E. Peralta, F. Ogliaro, M. J. Bearpark, J. J. Heyd, E. N. Brothers, K. N. Kudin, V. N. Staroverov, T. A. Keith, R. Kobayashi, J. Normand, K. Raghavachari, A. P. Rendell, J. C. Burant, S. S. Iyengar, J. Tomasi, M. Cossi, J. M. Millam, M. Klene, C. Adamo, R. Cammi, J. W. Ochterski, R. L. Martin, K. Morokuma, O. Farkas, J. B. Foresman, and D. J. Fox, Gaussian 16, Revision B.01, Gaussian, Inc., Wallingford CT, **2016**.
